# Supplementary material for: Multicolor mechanoluminescence for integrated dual-mode stress and temperature sensing
Source: Royal Society of Chemistry journal article supplement (doi:10.1039/d4qi03338h), 2025-01-01
Supplement: d4qi03338h1.pdf [file d4qi03338h1.pdf]

## Supplementary Material

### **Multicolor Mechanoluminescence for Integrated Dual-mode Stress and Temperature Sensing**

Pengfei Zhang<sup>a,b</sup>, Ziyi Guo<sup>a,b</sup>, Zhiting Wei<sup>a,b</sup>, Wenbo Chen<sup>a\*</sup>, Qiping Qiang<sup>a</sup>, Bitao Liu<sup>a</sup>, Tianchun Lang<sup>a</sup>, Lingling Peng<sup>a</sup>, Wenjie Wang<sup>c\*</sup>, Lei Zhao<sup>b\*</sup>

<sup>a</sup> *Engineering Research Center of New Energy Storage Devices and Applications, Chongqing University of Arts and Sciences, Chongqing 402160, P. R. China*

<sup>b</sup> *School of Physics and Opto-Electronic Technology, Baoji University of Arts and Sciences, Baoji, Shaanxi 721016, P. R. China*

<sup>c</sup> *Gansu Province Research Center for Basic Sciences of Surface and Interface Chemistry, College of Chemical Engineering, Northwest Minzu University, Lanzhou, Gansu 730030, P. R. China*

*\* Corresponding author' email:*

*qschenbo@sina.com (Wenbo Chen),*

*wangwj@xbmu.edu.cn (Wenjie Wang),*

*zhaoleibjwl@163.com (Lei Zhao).*

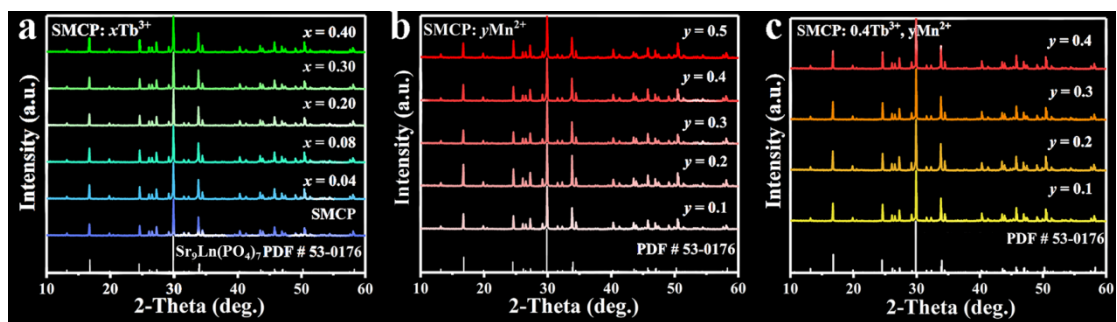

Fig. S1 a-c. XRD patterns of as-prepared SMCP:  $x\text{Tb}^{3+}$  ( $0 \leq x \leq 0.4$ ), SMCP:  $y\text{Mn}^{2+}$  ( $0.1 \leq y \leq 0.5$ ), SMCP:  $0.4\text{Tb}^{3+}, y\text{Mn}^{2+}$  ( $0 \leq y \leq 0.4$ ) samples and the standard data of the  $\text{Sr}_9\text{Cr}(\text{PO}_4)_7$  phase (PDF # 53-0176).

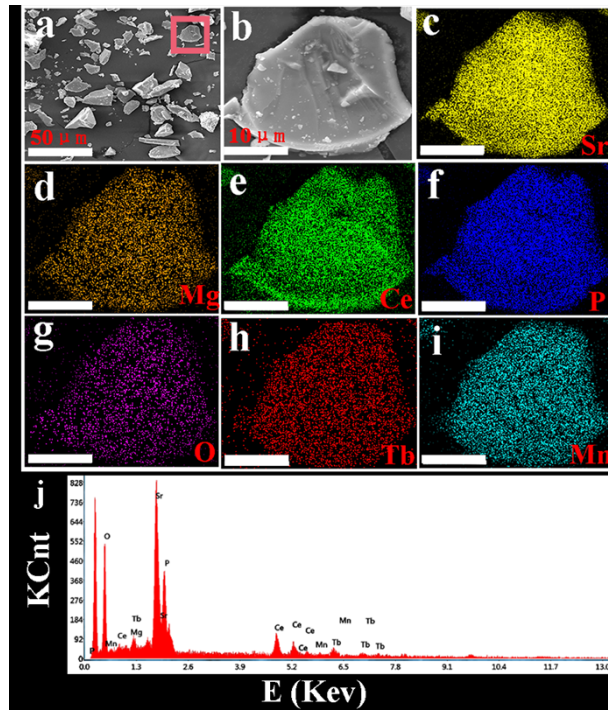

Fig. S2 a-b. SEM images of SMCP:  $0.4\text{Tb}^{3+}$ ,  $0.4\text{Mn}^{2+}$ ; c-j. Elemental mappings and EDS for Sr, Mg, Ce, P, O, Tb and Mn.

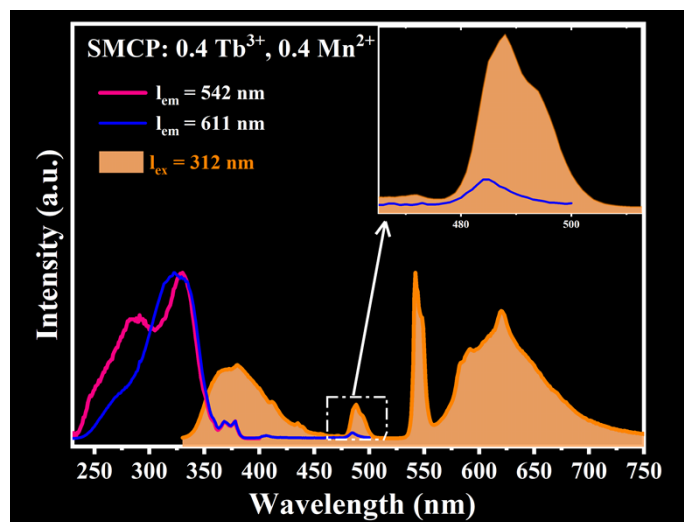

Fig. S3 PL and PLE spectra of SMCP: 0.4Tb<sup>3+</sup>, 0.4Mn<sup>2+</sup>.

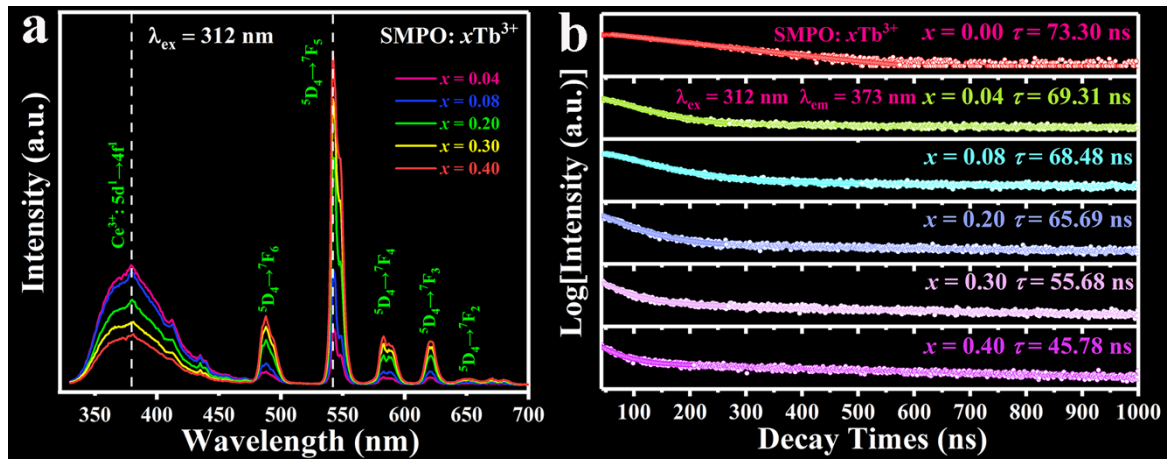

Fig. S4 a. Dependence of PL spectra of SMCP:  $x\text{Tb}^{3+}$  ( $x = 0.04, 0.08, 0.2, 0.3, 0.4$ ) excited at 312 nm; b. Decay curves of host emission in SMCP:  $x\text{Tb}^{3+}$  ( $x = 0.04, 0.08, 0.2, 0.3, 0.4$ ) at 312nm excitation and 373nm monitoring.

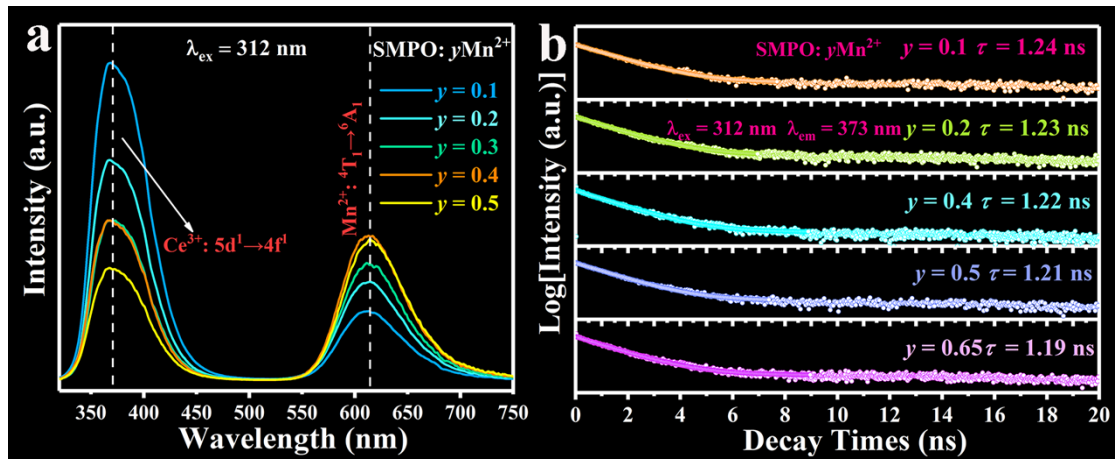

Fig. S5 a. Dependence of PL spectra of SMCP:  $y\text{Mn}^{2+}$  ( $x = 0.1, 0.2, 0.3, 0.4, 0.5$ ) excited at 312 nm; b. Decay curves of host emission in SMCP:  $y\text{Mn}^{2+}$  ( $x = 0.1, 0.2, 0.3, 0.4, 0.5$ ) at 312 nm excitation and 373 nm monitoring.

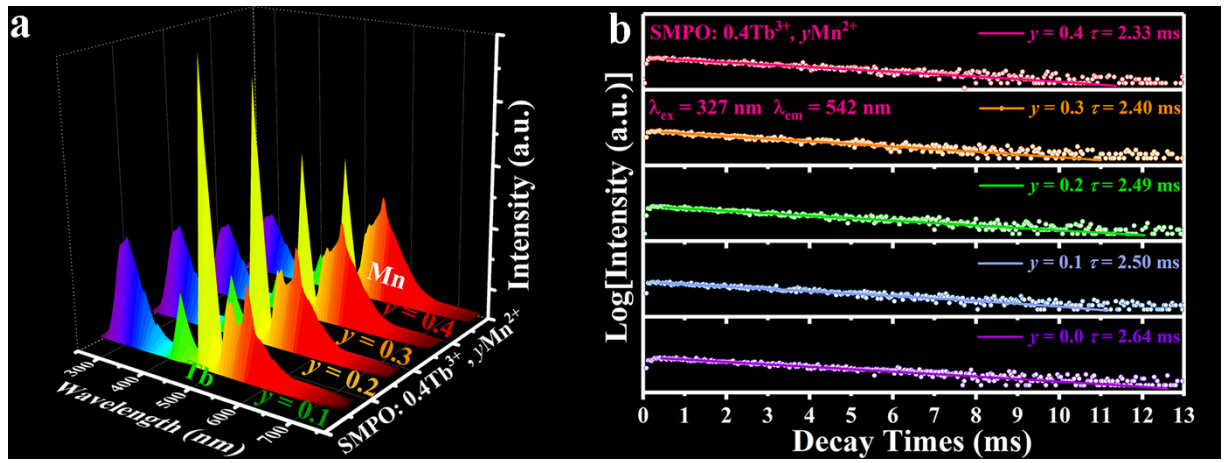

Fig. S6 a. Dependence of PL spectra of SMCP: 0.4Tb<sup>3+</sup>, yMn<sup>2+</sup> (y = 0.1, 0.2, 0.3, 0.4) excited at 312 nm; b. Decay curves of Tb emission in SMCP: 0.4Tb<sup>3+</sup>, yMn<sup>2+</sup> (y = 0.1, 0.2, 0.3, 0.4) at 327 nm excitation and 542 nm monitoring.

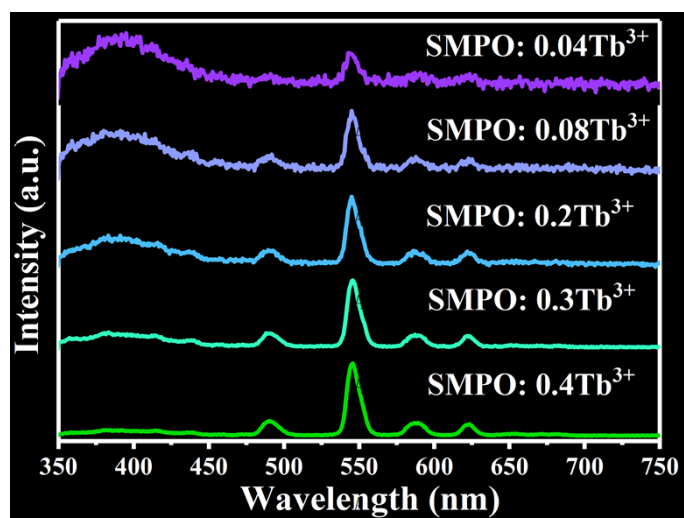

Fig. S7 Dependence of ML spectra of SMCP:  $x\text{Tb}^{3+}$  ( $x = 0.04, 0.08, 0.2, 0.3, 0.4$ ) in the dark under stretching.



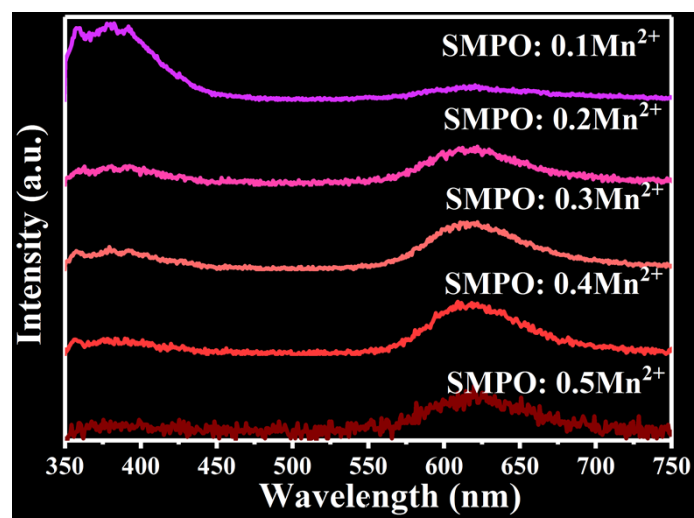

Fig. S8 Dependence of ML spectra of SMCP:  $y\text{Mn}^{2+}$  ( $x = 0.1, 0.2, 0.3, 0.4, 0.5$ ) in the dark under stretching.

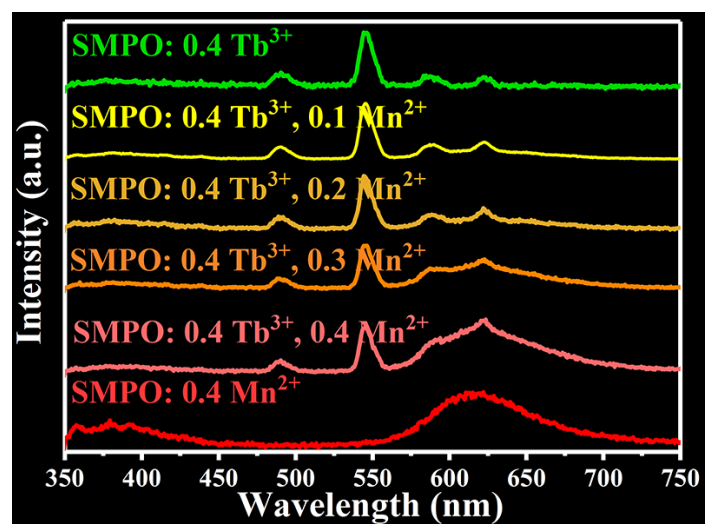

Fig. S9 Dependence of ML spectra of SMCP: 0.4Tb<sup>3+</sup>, yMn<sup>2+</sup>(y = 0.1, 0.2, 0.3, 0.4) in the dark under stretching.

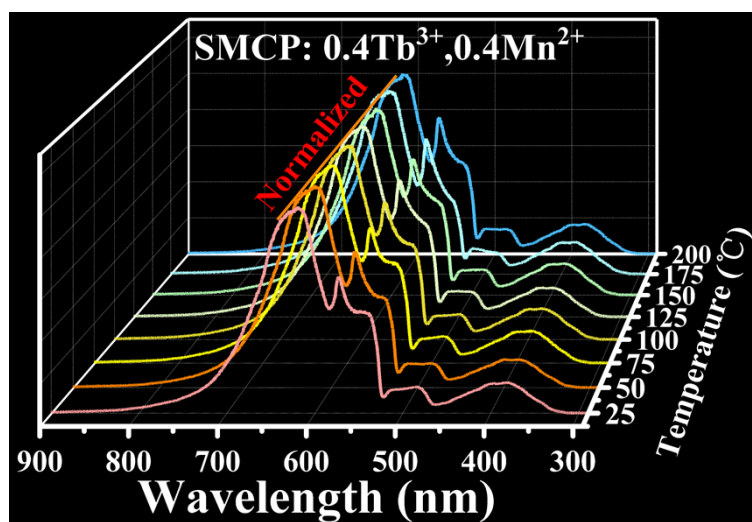

Fig. S10 ML spectra of SMCP: 0.4Tb<sup>3+</sup>, 0.4Mn<sup>2+</sup> at different temperature .

Table 1 Final refined structural parameters for SMCP

| Formula               | SMCP                                              |
|-----------------------|---------------------------------------------------|
| Crystal system        | Monoclinic                                        |
| Space group           | I2/a (No. 15)                                     |
| Vol (Å <sup>3</sup> ) | 2542.21                                           |
| Unit cell dimens (Å)  | a = b = 7.896 (4) Å c = 5.207 (2) Å               |
| Reliability factors   | R <sub>wp</sub> = 9.65 %, R <sub>p</sub> = 7.11 % |
| Program               | GSAS                                              |

Table 2 CIE diagram of PL

| PL CIE (x,y)       | x      | y      |
|--------------------|--------|--------|
| SMCP               | 0.1895 | 0.0606 |
| SMCP: 0.02Tb       | 0.2249 | 0.2195 |
| SMCP: 0.08Tb       | 0.2523 | 0.3094 |
| SMCP: 0.2Tb        | 0.2942 | 0.4485 |
| SMCP: 0.3Tb        | 0.312  | 0.5072 |
| SMCP: 0.4Tb        | 0.3194 | 0.5309 |
| SMCP: 0.1Mn        | 0.4433 | 0.2433 |
| SMCP: 0.2Mn        | 0.5161 | 0.2985 |
| SMCP: 0.3Mn        | 0.5498 | 0.3191 |
| SMCP: 0.4Mn        | 0.568  | 0.3299 |
| SMCP: 0.5Mn        | 0.5798 | 0.3338 |
| SMCP: 0.4Tb, 0.1Mn | 0.4133 | 0.4386 |
| SMCP: 0.4Tb, 0.2Mn | 0.4441 | 0.4278 |
| SMCP: 0.4Tb, 0.3Mn | 0.4933 | 0.4048 |
| SMCP: 0.4Tb, 0.4Mn | 0.5131 | 0.3994 |

Table 3 CIE diagram of ML

| ML CIE (x,y)       | x       | y       |
|--------------------|---------|---------|
| SMCP               | 0. 2375 | 0. 1755 |
| SMCP: 0.02Tb       | 0. 2912 | 0. 2907 |
| SMCP: 0.08Tb       | 0. 2917 | 0. 3371 |
| SMCP: 0.2Tb        | 0. 2924 | 0. 3734 |
| SMCP: 0.3Tb        | 0. 3153 | 0. 4478 |
| SMCP: 0.4Tb        | 0. 3329 | 0. 5226 |
| SMCP: 0.1Mn        | 0. 3688 | 0. 2237 |
| SMCP: 0.2Mn        | 0. 5176 | 0. 3421 |
| SMCP: 0.3Mn        | 0. 5492 | 0. 3435 |
| SMCP: 0.4Mn        | 0. 5597 | 0. 3413 |
| SMCP: 0.5Mn        | 0. 4744 | 0. 3589 |
| SMCP: 0.4Tb, 0.1Mn | 0. 4115 | 0. 4633 |
| SMCP: 0.4Tb, 0.2Mn | 0. 4053 | 0. 4286 |
| SMCP: 0.4Tb, 0.3Mn | 0. 4726 | 0. 4069 |
| SMCP: 0.4Tb, 0.4Mn | 0. 5143 | 0. 3919 |
